# Supplementary material
Source: HighWire-hosted journal article supplement (https://qualitysafety.bmj.com/content/28/5/405)
Supplement: inline-supplementary-material-2 [file inline-supplementary-material-2.pdf]

# PACT Coordination Console

SAMPLE REPORT: Hover over arrows on actual report to receive more information on each feature

PACT UG 01\*WH\*

September, 2015

## Bird's Eye View

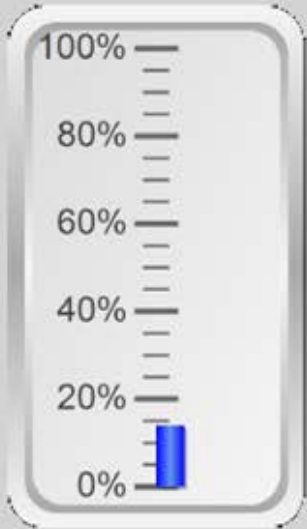

Coordination overall this period: 14%

## Help Me Improve

Ideas from last Meeting

Ideas for Next Period

Coordination Resources

## Show Me More

Overview for this Period

Indicator Detail

History

Priorities for Next Period

## How Are We Doing?

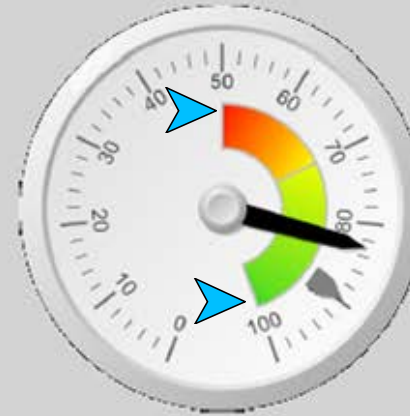

Appointments Starting on Time

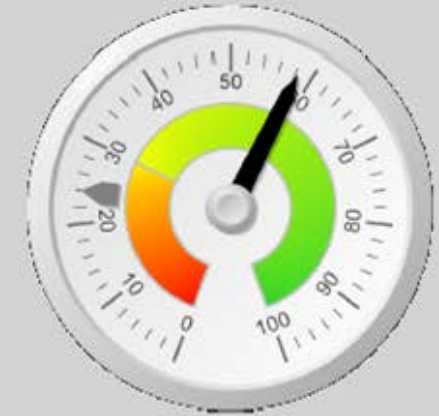

Education Offerings Utilization

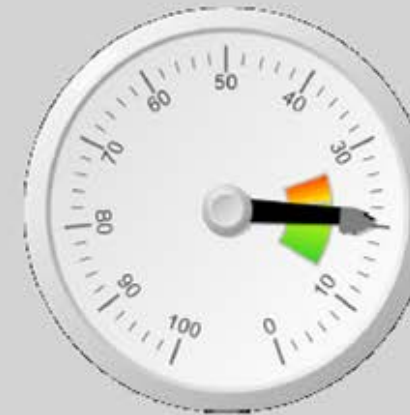

Reliance on ER Care by Current PACT Patients

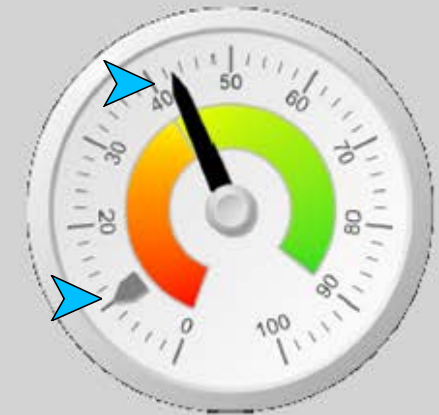

New Patient Orientation Utilization

### Bird's Eye View

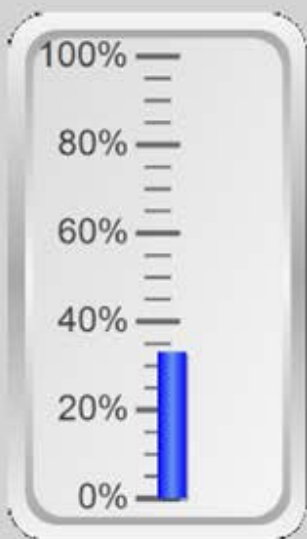

Target Coordination Overall for Next Period: 33%

### Help Me Improve

Ideas from last Meeting

Ideas for Next Period

Coordination Resources

### Show Me More

Coordination Console

Overview for this Period

History

Indicator Detail

### Target Gains for Next Period

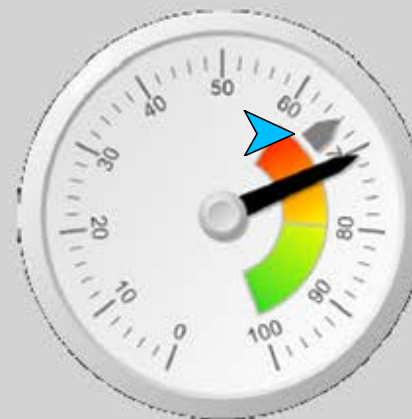

Patient Satisfaction

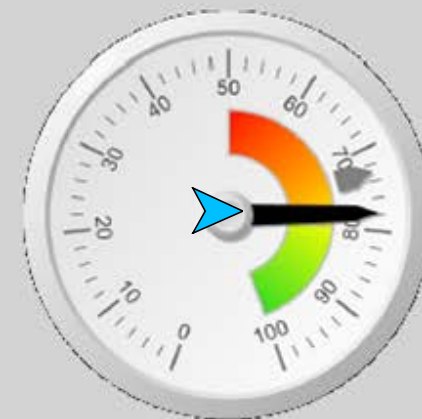

Clinical Reminder Completion

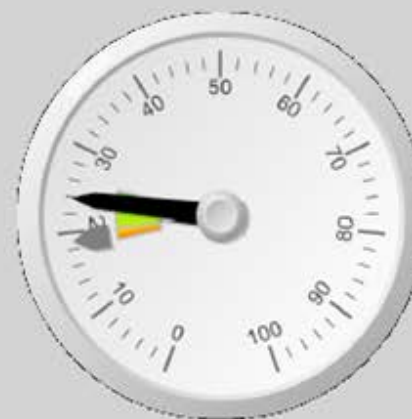

My Health-E VET Secure Messaging Enrollment

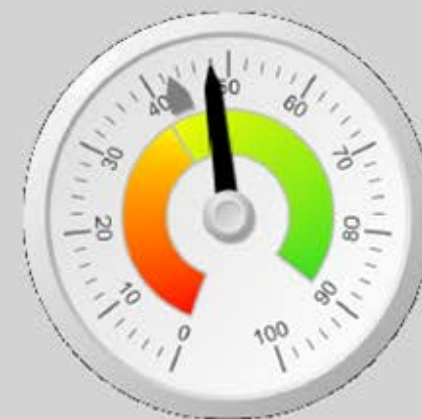

New Patient Orientation Utilization

# Coordination Indicator Overview

PACT UG 01 \*WH\*

September, 2015

| Indicator Name                                                                                      | Previous Period |               | Current Period  |               | Change from Previous Period |               |
|-----------------------------------------------------------------------------------------------------|-----------------|---------------|-----------------|---------------|-----------------------------|---------------|
|                                                                                                     | Indicator Value | Effectiveness | Indicator Value | Effectiveness | Indicator                   | Effectiveness |
| <b>Objective: Support and Foster Veteran Engagement in Their Wellness by Being Patient-Centered</b> |                 |               |                 |               |                             |               |
| Reliance on ER Care by Current PACT Patients                                                        | 20.3            | 80.0          | 20.9            | 80.0          | 0.6                         | 0.0           |
| My Health-E VET Secure Messaging Enrollment                                                         | 19.2            | -54.0         | 18.9            | -54.0         | -0.3                        | 0.0           |
| Education Offerings Utilization                                                                     | 24.0            | -16.8         | 58.3            | 23.2          | 34.3                        | 40.0          |
| <b>Objective: Ensure that Veterans Receive High Quality, Efficient Care</b>                         |                 |               |                 |               |                             |               |
| Appointments Starting on Time                                                                       | 89.7            | 91.6          | 82.9            | 37.9          | -6.8                        | -53.7         |
| New Patient Orientation Utilization                                                                 | 10.0            | -90.0         | 42.9            | 4.7           | 32.9                        | 94.7          |
| Patient Satisfaction                                                                                | 60.4            | -72.0         | 65.7            | -72.0         | 5.3                         | 0.0           |
| Clinical Reminder Completion                                                                        |                 |               | 72.8            | -54.6         |                             |               |

Coordination Console

History Detail

Indicator Detail

Priorities for Next Period

# Coordination Indicator History

PACT UG 01 \*WH\*

September, 2015

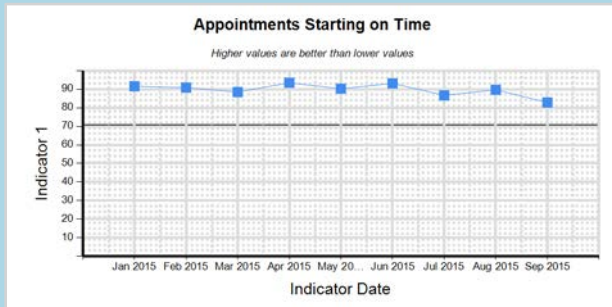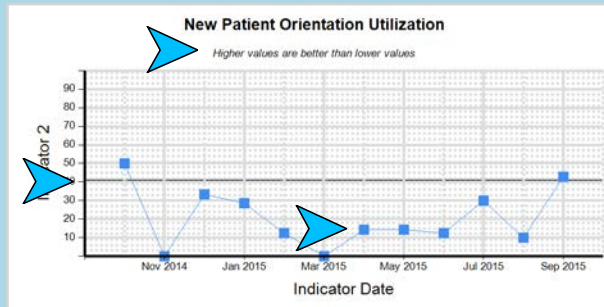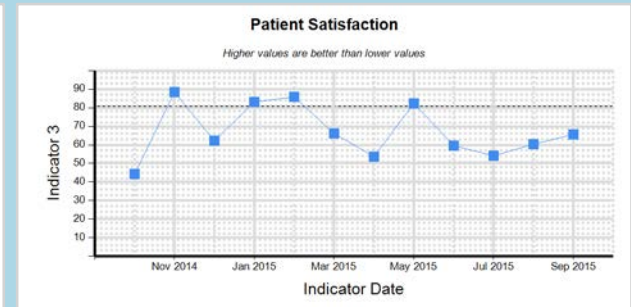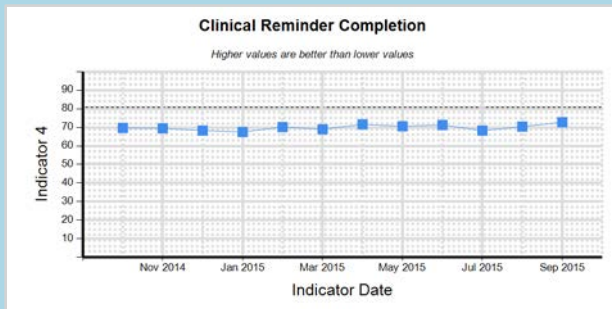

**Timely Recall Scheduling**  
Higher values are better than lower values

No Data Available

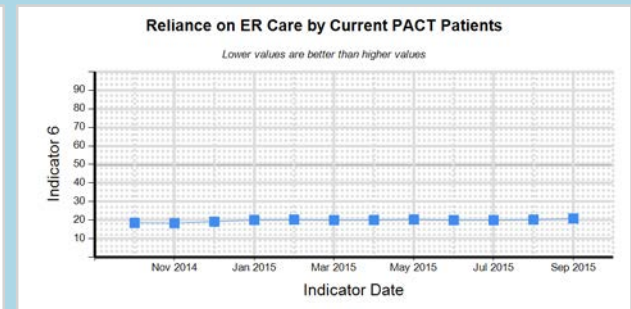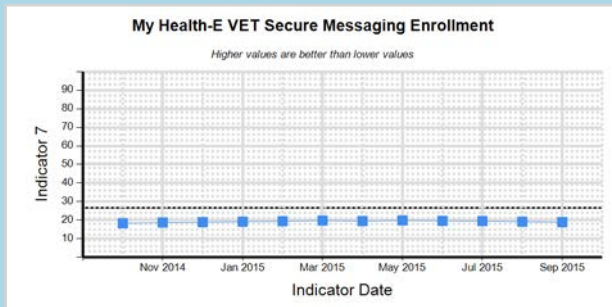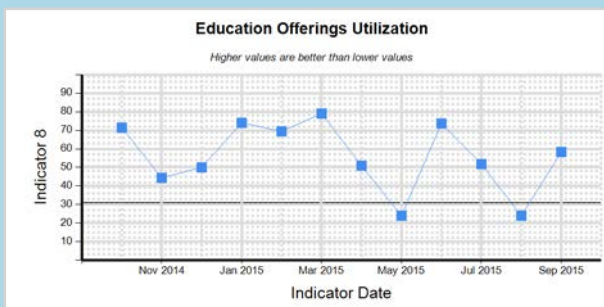

Coordination Console

Indicator Overview

Indicator Detail

Priorities for Next Period



# Indicator 1 Detail

Appointments Starting on Time

PACT UG 01 \*WH\*

September, 2015

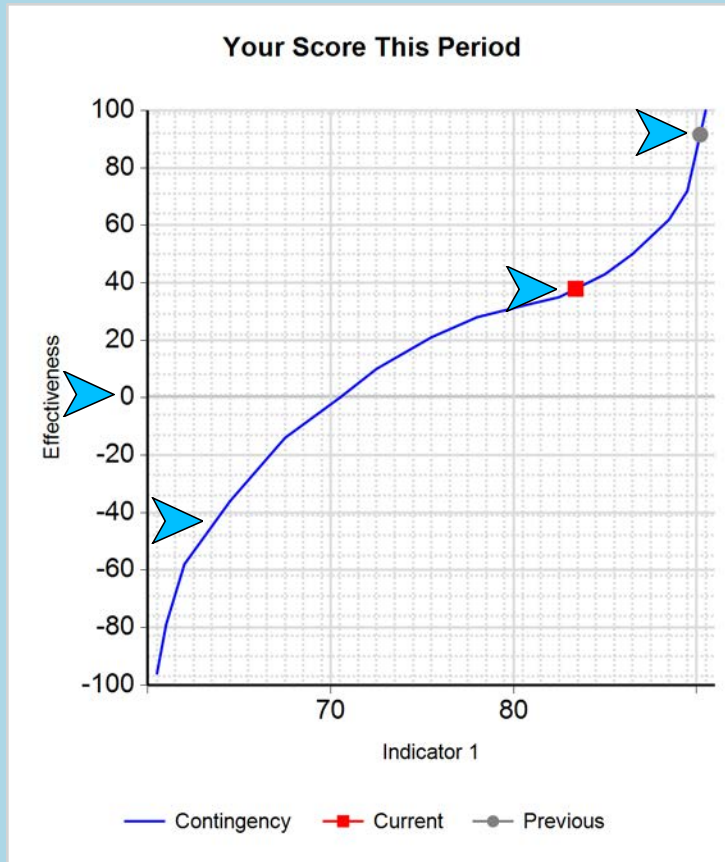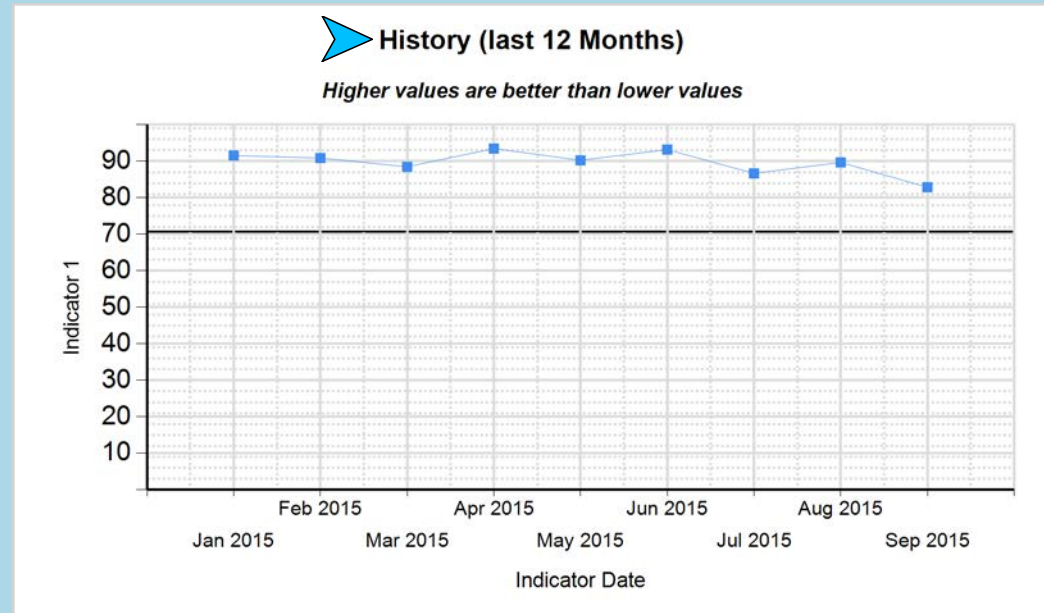

Previous

Next

### Show Me More

|                      |                            |
|----------------------|----------------------------|
| Coordination Console | Overview for this Period   |
| History              | Priorities for Next Period |
